# Supplementary material for: A MOF functionalized with CdTe quantum dots as an efficient white light emitting phosphor material for applications in displays
Source: Royal Society of Chemistry journal article supplement (doi:10.1039/c9nj04304g), 2019-11-22
Supplement: c9nj04304g1.pdf [file c9nj04304g1.pdf]

# MOF Functionalized with CdTe Quantum Dots as an Efficient White Light Emitting Phosphor Material for Applications in Displays

---

Tuhina Mondal<sup>a</sup>, Dhrubaa Haldar<sup>a</sup>, Arnab Ghosh<sup>a</sup>, Uttam Kumar Ghorai<sup>b</sup> and Shyamal K Saha<sup>a\*</sup>

<sup>a</sup>School of Materials Sciences, Indian Association for the Cultivation of Science.

2A and 2B Raja S C Mullick Road, Jadavpur, Kolkata - 700032, India.

<sup>b</sup>Department of Industrial Chemistry and Applied Chemistry, Swami Vivekananda Research Centre, Ramakrishna Mission Vidyamandira, Belur Math, Howrah-711202, India.

\*Email of the corresponding author: [cnssks@iacs.res.in](mailto:cnssks@iacs.res.in)

**Table 1:**

|                                             |                                                                |
|---------------------------------------------|----------------------------------------------------------------|
| Empirical formula                           | C <sub>18</sub> H <sub>9</sub> CdN <sub>2</sub> O <sub>8</sub> |
| Formula weight                              | 493.67                                                         |
| Temperature/K                               | 100                                                            |
| Crystal system                              | monoclinic                                                     |
| Space group                                 | C2/c                                                           |
| a/Å                                         | 21.989(2)                                                      |
| b/Å                                         | 11.1499(9)                                                     |
| c/Å                                         | 19.1729(17)                                                    |
| α/°                                         | 90                                                             |
| β/°                                         | 114.252(5)                                                     |
| γ/°                                         | 90                                                             |
| Volume/Å <sup>3</sup>                       | 4285.9(7)                                                      |
| Z                                           | 8                                                              |
| ρ <sub>calc</sub> /g/cm <sup>3</sup>        | 1.530                                                          |
| μ/mm <sup>-1</sup>                          | 1.062                                                          |
| F(000)                                      | 1944.0                                                         |
| Crystal size/mm <sup>3</sup>                | 0.351 × 0.17 × 0.135                                           |
| Radiation                                   | MoKα (λ = 0.71073)                                             |
| 2θ range for data collection/°              | 4.064 to 52.744                                                |
| Index ranges                                | -27 ≤ h ≤ 26, -13 ≤ k ≤ 13, -23 ≤ l ≤ 23                       |
| Reflections collected                       | 24332                                                          |
| Independent reflections                     | 4384 [R <sub>int</sub> = 0.0549, R <sub>sigma</sub> = 0.0423]  |
| Data/restraints/parameters                  | 4384/1/219                                                     |
| Goodness-of-fit on F <sup>2</sup>           | 0.971                                                          |
| Final R indexes [I ≥ 2σ (I)]                | R <sub>1</sub> = 0.0801, wR <sub>2</sub> = 0.2015              |
| Final R indexes [all data]                  | R <sub>1</sub> = 0.0875, wR <sub>2</sub> = 0.2057              |
| Largest diff. peak/hole / e Å <sup>-3</sup> | 1.75/-1.84                                                     |

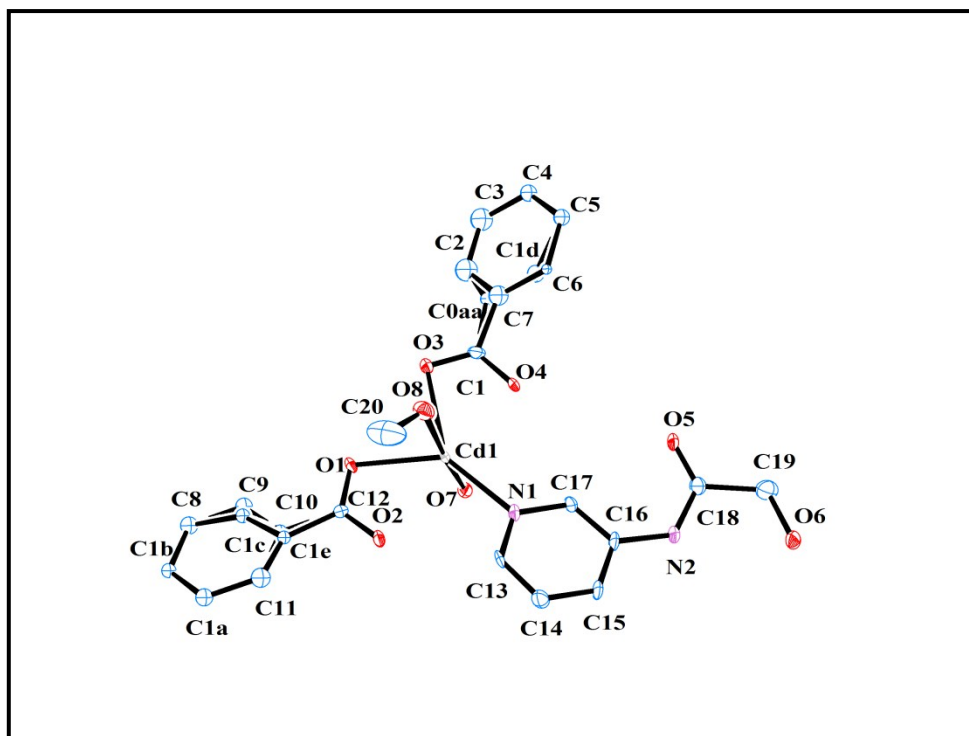

SI2: ORTEP view of the asymmetric unit of CP1 crystal.

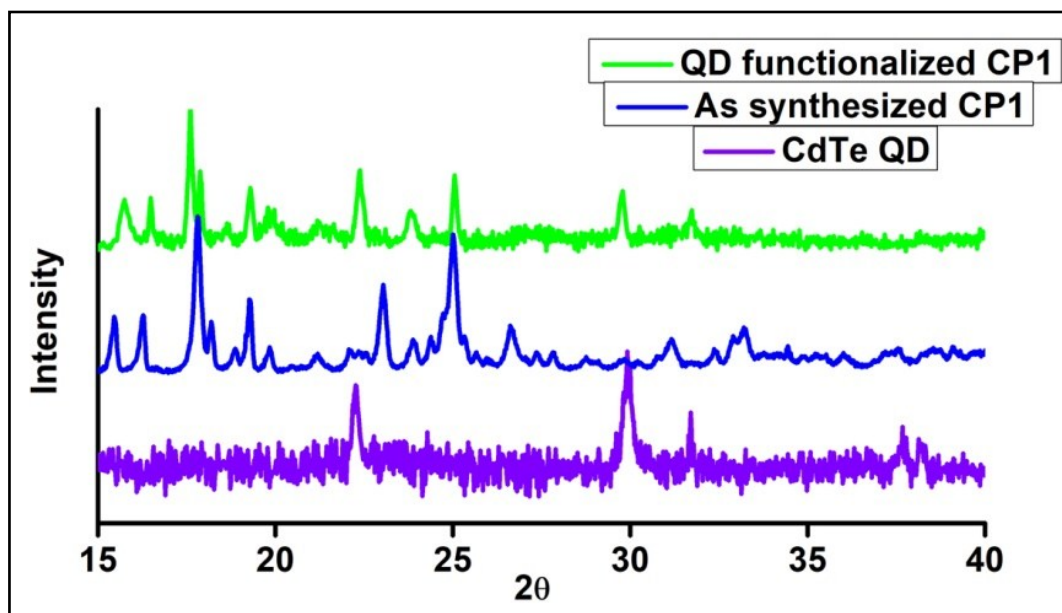

SI3: PXRD of pristine CdTe QD, CP1 and QD functionalized CP1

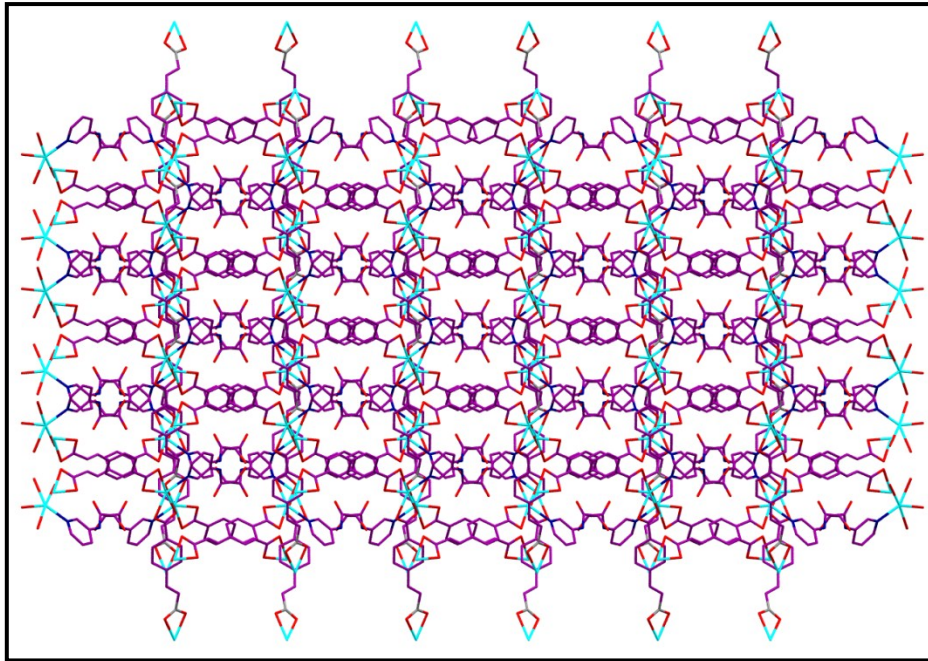

**SI4: Packing of CP1 in 3D.**

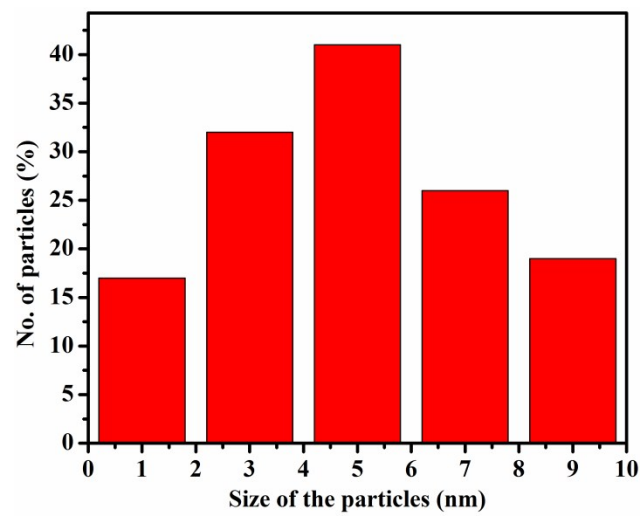

**SI5: Size distribution plot of CdTe QDs.**

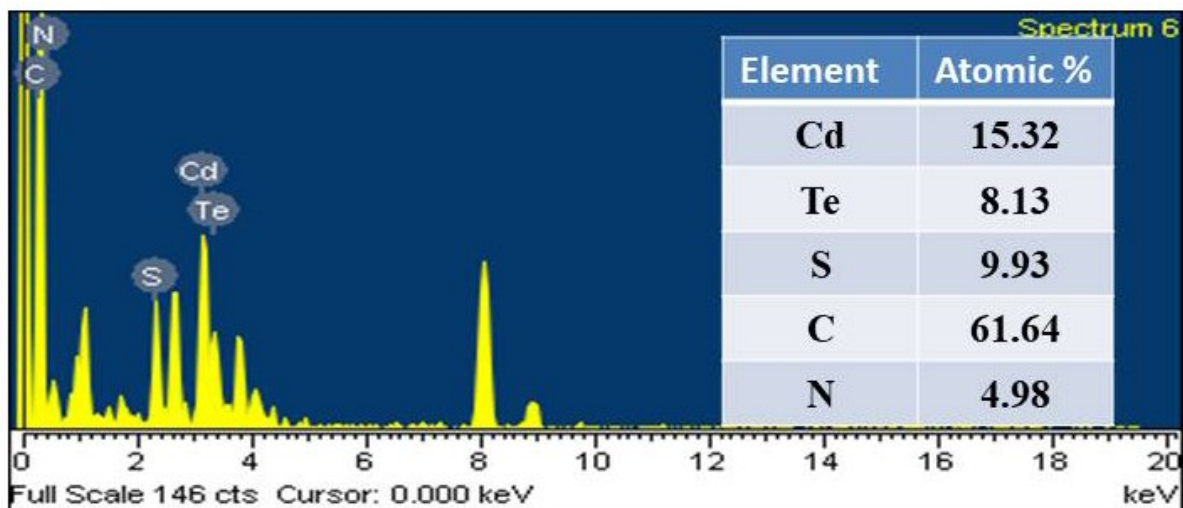

SI6: EDX analysis of CdTe QDs.

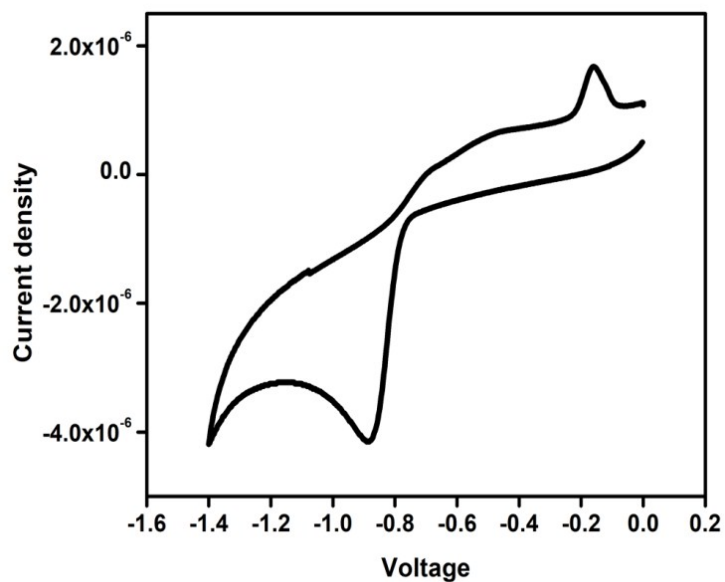

SI7: CV diagram of CP1.

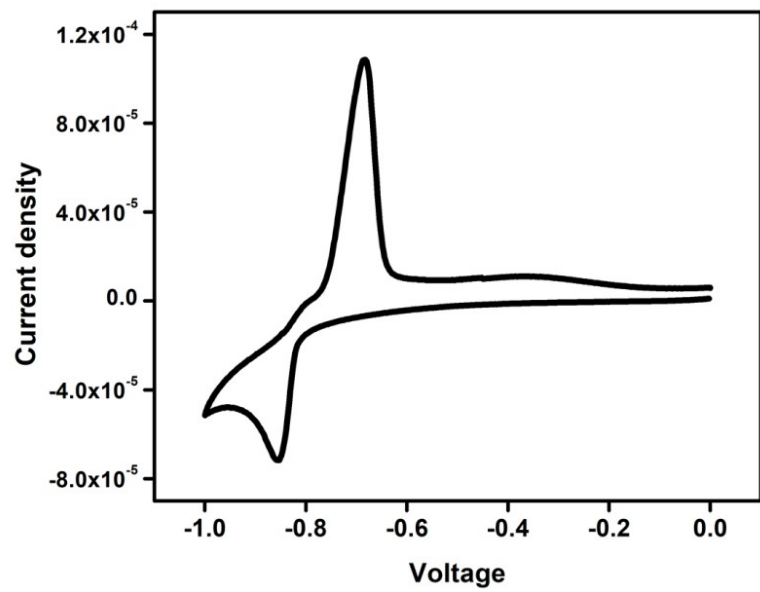

**SI8: CV diagram of QD functionalizedCP1.**
